# Supplementary material for: Luteolin Induces Selective Cell Death of Human Pluripotent Stem Cells
Source: MDPI journal article supplement (doi:10.3390/biomedicines8110453), 2020-10-27

## Supplementary materials

### Supplementary Figure legends

**Figure S1** (A) mRNA expression of indicated gene in hESCs (H9) and hDFs (B) Graphical presentation of live cells (dual negative population of Annexin V/7-AAD staining ) at 24 hours after treatment of 50µM of each flavonoid in hESCs

**Figure S2** IC50 plot of LUT and QC

**Movie S1.** Real time images of hESCs after treatment of mock (A) QC (B) or LUT (C)

**Movie S2.** Real time image of spontaneous contraction in hESC-CMs

**Movie S3.** Real time fluorescence image of Ca<sup>2+</sup> oscillation in hESC-CMs

**Movie S4.** Real time fluorescence image of Ca<sup>2+</sup> oscillation in hESC-CMs after treatment of Mock (A) or 12.5µM of LUT (B)

Figure. S1

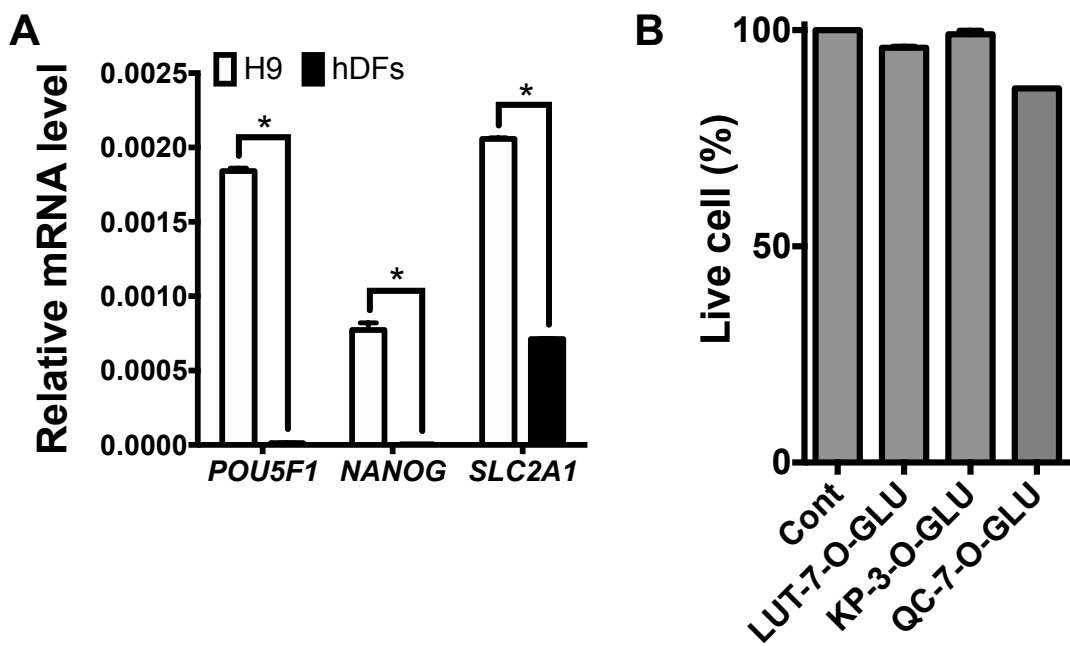

Figure. S2

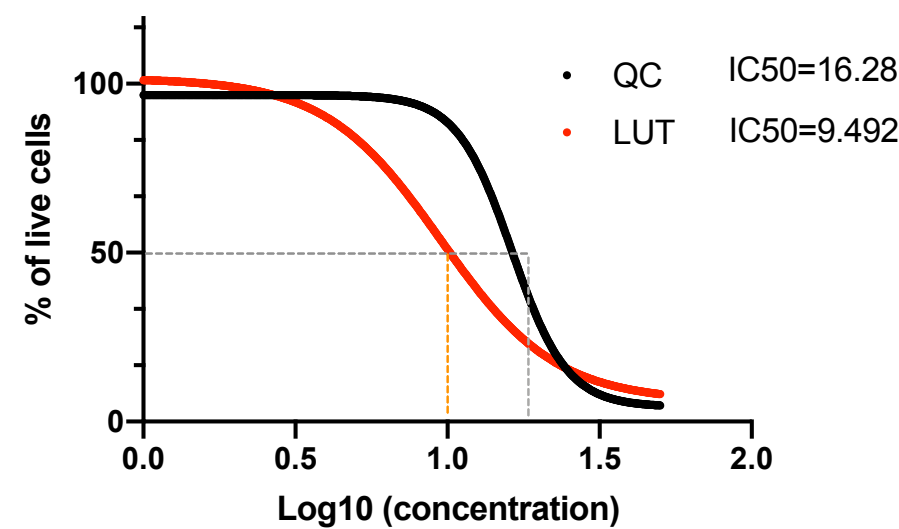

Supplement: s1 [file s1]
